# Supplementary material for: A score of DNA damage repair pathway with the predictive ability for chemotherapy and immunotherapy is strongly associated with immune signaling pathway in pan-cancer
Source: Front Immunol. 2022 Aug 23;13:943090. doi: 10.3389/fimmu.2022.943090 (PMC9445361; doi:10.3389/fimmu.2022.943090)
Supplement: Supplementary file 13 [file Table_4.xlsx]

## Sheet: DNA replication
TABLE S4: Signatures of cancer hallmarks.
DNA replication
POLD3
DNA2
FEN1
POLA2
RNASEH1
RPA4
LIG1
MCM2
MCM3
MCM4
MCM5
MCM6
MCM7
PCNA
POLE3
POLA1
POLD1
POLD2
POLE
POLE2
PRIM1
PRIM2
POLE4
POLD4
RFC1
RFC2
RFC3
RFC4
RFC5
RPA1
RPA2
RPA3
SSBP1
RNASEH2B
RNASEH2C

## Sheet: Proliferation
Tumor proliferation signature
# Tumor hypoxia causes DNA hypermethylation by reducing TET activity. Nature . 2016
MKI67
NDC80
NUF2
PTTG1
RRM2
BIRC5
CCNB1
CEP55
UBE2C
CDC20
TYMS

## Sheet: G2M checkpoint
G2M checkpoint
> Genes involved in the G2/M checkpoint, as in progression through the cell division cycle.
ABL1
AMD1
ARID4A
ATF5
ATRX
AURKA
AURKB
BARD1
BCL3
BIRC5
BRCA2
BUB1
BUB3
CASP8AP2
CBX1
CCNA2
CCNB2
CCND1
CCNF
CCNT1
CDC20
CDC25A
CDC25B
CDC27
CDC45
CDC6
CDC7
CDK1
CDK4
CDKN1B
CDKN2C
CDKN3
CENPA
CENPE
CENPF
CHAF1A
CHEK1
CHMP1A
CKS1B
CKS2
CTCF
CUL1
CUL3
CUL4A
CUL5
DBF4
DDX39A
DKC1
DMD
DR1
DTYMK
E2F1
E2F2
E2F3
E2F4
EFNA5
EGF
ESPL1
EWSR1
EXO1
EZH2
FANCC
FBXO5
FOXN3
G3BP1
GINS2
GSPT1
H2AFV
H2AFX
H2AFZ
HIF1A
HIRA
HIST1H2BK
HMGA1
HMGB3
HMGN2
HMMR
HNRNPD
HNRNPU
HOXC10
HSPA8
HUS1
ILF3
INCENP
JPT1
KATNA1
KIF11
KIF15
KIF20B
KIF22
KIF2C
KIF4A
KIF5B
KMT5A
KNL1
KPNA2
KPNB1
LBR
LIG3
LMNB1
MAD2L1
MAP3K20
MAPK14
MARCKS
MCM2
MCM3
MCM5
MCM6
MEIS1
MEIS2
MKI67
MNAT1
MT2A
MTF2
MYBL2
MYC
NASP
NCL
NDC80
NEK2
NOLC1
NOTCH2
NSD2
NUMA1
NUP50
NUP98
NUSAP1
ODC1
ODF2
ORC5
ORC6
PAFAH1B1
PBK
PDS5B
PLK1
PLK4
PML
POLA2
POLE
POLQ
PRC1
PRIM2
PRMT5
PRPF4B
PTTG1
PTTG3P
PURA
RACGAP1
RAD21
RAD23B
RAD54L
RASAL2
RBL1
RBM14
RPA2
RPS6KA5
SAP30
SFPQ
SLC12A2
SLC38A1
SLC7A1
SLC7A5
SMAD3
SMARCC1
SMC1A
SMC2
SMC4
SNRPD1
SQLE
SRSF1
SRSF10
SRSF2
STAG1
STIL
STMN1
SUV39H1
SYNCRIP
TACC3
TENT4A
TFDP1
TGFB1
TLE3
TMPO
TNPO2
TOP1
TOP2A
TPX2
TRA2B
TRAIP
TROAP
TTK
UBE2C
UBE2S
UCK2
UPF1
WRN
XPO1
YTHDC1

## Sheet: Stem cell genes
Stem cell gene set
# A gene expression profile of stem cell pluripotentiality and differentiation is conserved across diverse solid and hematopoietic cancers. Genome Biol. 2012
DNMT3B
MCM6
CDC25A
PFAS
MCM4
XRCC5
HAUS6
TET1
IGF2BP1
PLAA
DEPDC1B
TEX10
CCDC99
MSH2
BUB1B
MSH6
DLGAP5
SKIV2L2
CENPE
CHEK2
SOHLH2
CCNB1
RRAS2
PRIM1
PAICS
CCNA2
CPSF3
NUSAP1
LIN28B
IPO5
KIF11
BMPR1A
NDC80
BCAT1
CCNG1
ZNF788
ASCC3
FANCB
MCM10
HMGA2
SKP2
TRIM24
ORC1
HDAC2
HESX1
C1orf135
INHBE
MIS18A
DCUN1D5
POLE2
MRPL3
CENPH
MYCN
HAUS1
GDF3
TBCE
RIOK2
BCKDHB
RAD1
NREP
ADH5
PLRG1
ROR1
RAB3B
DBC1
KIF23
DIAPH3
GNL2
FGF2
TARDBP
NMNAT2
ZNF167
KIF20A
CENPI
DDX1
XXYLT1
GPR176
FBXO22
BBS9
C14orf166
BOD1
CDC123
SNRPD3
FAM118B
DPH3
EIF2B3
KDELC1
RPF2
APLP1
DACT1
PDHB
C14orf119
DTD1
SAMM50
CCL26
C4orf52
CCDC90B
MED20
UTP6
RARS2
KIAA0020
ARMCX2
RARS
MTHFD2
DHX15
HTR7
HIST1H4C
MTHFD1L
ARMC9
XPOT
IARS
HDX
ACTRT3
ERCC2
TBC1D16
GARS
KIF7
UBE2K
SLC25A3
ICMT
UGGT2
ATP11C
SLC24A1
EIF2AK4
GPX8
ALX1
OSTC
TRPC4
HAS2
FZD2
TRNT1
MMADHC
SNX8
CDH6
HAT1
SEC11A
DIMT1
TM2D2
FST
GBE1
MLL3
MXI1
FAM185BP
ARRB2
SMARCC2
WASH3P
PILRB
CTSH
SAT1
JUNB
CD53
PECAM1
IL10RA
RCSD1
ARHGDIB
GIMAP5
GIMAP6
HLA-DMB
PTPRC
C10orf128
CMBL
HLA-DRB5
HLA-DPA1
ABCG1
GIMAP7
HLA-DQA1
TSHZ2
RGCC
CCR1
NPR3
RSAD2
GIMAP1
TNFSF10
AFTPH
MALAT1
UBXN2A
PDE4C
GIMAP8
FYB
MS4A7
C5orf56
MLLT6
CTSS
ZBTB20
TOP1
TOP2A
TPX2
TRA2B
TRAIP
TROAP
TTK
UBE2C
UBE2S
UCK2
UPF1
WRN
XPO1
YTHDC1

## Sheet: MYC
MYC targets
> A subgroup of genes regulated by MYC - version 1 (v1).
ABCE1
ACP1
AIMP2
AP3S1
APEX1
BUB3
C1QBP
CAD
CANX
CBX3
CCNA2
CCT2
CCT3
CCT4
CCT5
CCT7
CDC20
CDC45
CDK2
CDK4
CLNS1A
CNBP
COPS5
COX5A
CSTF2
CTPS1
CUL1
CYC1
DDX18
DDX21
DEK
DHX15
DUT
EEF1B2
EIF1AX
EIF2S1
EIF2S2
EIF3B
EIF3D
EIF3J
EIF4A1
EIF4E
EIF4G2
EIF4H
EPRS
ERH
ETF1
EXOSC7
FAM120A
FBL
G3BP1
GLO1
GNL3
GOT2
GSPT1
H2AFZ
HDAC2
HDDC2
HDGF
HNRNPA1
HNRNPA2B1
HNRNPA3
HNRNPC
HNRNPD
HNRNPR
HNRNPU
HPRT1
HSP90AB1
HSPD1
HSPE1
IARS
IFRD1
ILF2
IMPDH2
KARS
KPNA2
KPNB1
LDHA
LSM2
LSM7
MAD2L1
MCM2
MCM4
MCM5
MCM6
MCM7
MRPL23
MRPL9
MRPS18B
MYC
NAP1L1
NCBP1
NCBP2
NDUFAB1
NHP2
NME1
NOLC1
NOP16
NOP56
NPM1
ODC1
ORC2
PA2G4
PABPC1
PABPC4
PCBP1
PCNA
PGK1
PHB
PHB2
POLD2
POLE3
PPIA
PPM1G
PRDX3
PRDX4
PRPF31
PRPS2
PSMA1
PSMA2
PSMA4
PSMA6
PSMA7
PSMB2
PSMB3
PSMC4
PSMC6
PSMD1
PSMD14
PSMD3
PSMD7
PSMD8
PTGES3
PWP1
RACK1
RAD23B
RAN
RANBP1
RFC4
RNPS1
RPL14
RPL18
RPL22
RPL34
RPLP0
RPS10
RPS2
RPS3
RPS5
RPS6
RRM1
RRP9
RSL1D1
RUVBL2
SERBP1
SET
SF3A1
SF3B3
SLC25A3
SMARCC1
SNRPA
SNRPA1
SNRPB2
SNRPD1
SNRPD2
SNRPD3
SNRPG
SRM
SRPK1
SRSF1
SRSF2
SRSF3
SRSF7
SSB
SSBP1
STARD7
SYNCRIP
TARDBP
TCP1
TFDP1
TOMM70
TRA2B
TRIM28
TUFM
TXNL4A
TYMS
U2AF1
UBA2
UBE2E1
UBE2L3
USP1
VBP1
VDAC1
VDAC3
XPO1
XPOT
XRCC6
YWHAE
YWHAQ
BYSL
DCTPP1
DUSP2
EXOSC5
FARSA
GRWD1
HK2
IMP4
IPO4
LAS1L
MAP3K6
MPHOSPH10
MRTO4
MYBBP1A
NDUFAF4
NIP7
NOC4L
NOP2
PES1
PLK1
PLK4
PPAN
PPRC1
PRMT3
PUS1
RABEPK
RCL1
RRP12
SLC19A1
SLC29A2
SORD
SUPV3L1
TBRG4
TCOF1
TFB2M
TMEM97
UNG
UTP20
WDR43
WDR74

## Sheet:  ECM-related genes
ECM-relatted genes
# An extracellular matrix-related prognostic and predictive indicator for early-stage non-small cell lung cancer. NATURE COMMUNICATIONS. 2017
COL11A1
COL10A1
COL6A6
SPP1
TNNC1
CTHRC1
ABI3BP
PCOLCE2
OGN
MMP12
MMP1
ADAMTS8
SFTPC
GREM1
SFTPA2
SFTPD
FCN3
WIF1
CHRDL1
S100A2
CXCL2
CXCL13
IL6
HHIP
S100A12
CPB2
MAMDC2
LPL
CD36

## Sheet: TGFB
TGFB
ACVR1
APC
ARID4B
BCAR3
BMP2
BMPR1A
BMPR2
CDH1
CDK9
CDKN1C
CTNNB1
ENG
FKBP1A
FNTA
FURIN
HDAC1
HIPK2
ID1
ID2
ID3
IFNGR2
JUNB
KLF10
LEFTY2
LTBP2
MAP3K7
NCOR2
NOG
PMEPA1
PPM1A
PPP1CA
PPP1R15A
RAB31
RHOA
SERPINE1
SKI
SKIL
SLC20A1
SMAD1
SMAD3
SMAD6
SMAD7
SMURF1
SMURF2
SPTBN1
TGFB1
TGFBR1
TGIF1
THBS1
TJP1
TRIM33
UBE2D3
WWTR1
XIAP

## Sheet: TP53
P53 pathway
> Genes involved in p53 pathways and networks.
ABAT
ABCC5
ABHD4
ACVR1B
ADA
AEN
AK1
ALOX15B
ANKRA2
APAF1
APP
ATF3
BAIAP2
BAK1
BAX
BLCAP
BMP2
BTG1
BTG2
CASP1
CCND2
CCND3
CCNG1
CCNK
CCP110
CD81
CD82
CDH13
CDK5R1
CDKN1A
CDKN2A
CDKN2AIP
CDKN2B
CEBPA
CGRRF1
CLCA2
COQ8A
CSRNP2
CTSD
CTSF
CYFIP2
DCXR
DDB2
DDIT3
DDIT4
DEF6
DGKA
DNTTIP2
DRAM1
EI24
ELP1
EPHA2
EPHX1
EPS8L2
ERCC5
F2R
FAM162A
FAS
FBXW7
FDXR
FGF13
FOS
FOXO3
FUCA1
GADD45A
GLS2
GM2A
GPX2
H2AFJ
HBEGF
HDAC3
HEXIM1
HINT1
HIST1H1C
HIST3H2A
HMOX1
HRAS
HSPA4L
IER3
IER5
IFI30
IL1A
INHBB
IP6K2
IRAK1
ISCU
ITGB4
JAG2
JUN
KIF13B
KLF4
KLK8
KRT17
LDHB
LIF
LRMP
MAPKAPK3
MDM2
MKNK2
MXD1
MXD4
NDRG1
NHLH2
NINJ1
NOL8
NOTCH1
NUDT15
NUPR1
OSGIN1
PCNA
PDGFA
PERP
PHLDA3
PIDD1
PITPNC1
PLK2
PLK3
PLXNB2
PMM1
POLH
POM121
PPM1D
PPP1R15A
PRKAB1
PRMT2
PROCR
PTPN14
PTPRE
PVT1
RAB40C
RACK1
RAD51C
RAD9A
RALGDS
RAP2B
RB1
RCHY1
RETSAT
RGS16
RHBDF2
RNF19B
RPL18
RPL36
RPS12
RPS27L
RRAD
RRP8
RXRA
S100A10
S100A4
SAT1
SDC1
SEC61A1
SERPINB5
SERTAD3
SESN1
SFN
SLC19A2
SLC35D1
SLC3A2
SLC7A11
SOCS1
SP1
SPHK1
ST14
STEAP3
STOM
TAP1
TAX1BP3
TCHH
TCN2
TGFA
TGFB1
TM4SF1
TM7SF3
TNFSF9
TNNI1
TOB1
TP53
TP63
TPD52L1
TPRKB
TRAF4
TRAFD1
TRIAP1
TRIB3
TSC22D1
TSPYL2
TXNIP
UPP1
VAMP8
VDR
VWA5A
WRAP73
WWP1
XPC
ZBTB16
ZFP36L1
ZMAT3
ZNF365

## Sheet: EMT
EMT markers
# The epithelial mesenchymal transition: new insights in signaling development and disease. J Cell Biol. 2019
# Pan-cancer Survey of Epithelial–Mesenchymal Transition Markers Across The Cancer Genome Atlas. DEVELOPMENTAL DYNAMICS. 2017
VIM
CDH2
FOXC2
SNAI1
SNAI2
TWIST1
FN1
ITGB6
MMP2
MMP3
MMP9
SOX10
CDH1
DSP
OCLN

## Sheet: Angiogenesis
Angiogenesis
> Genes up-regulated during formation of blood vessels (angiogenesis).
APOH
APP
CCND2
COL3A1
COL5A2
CXCL6
FGFR1
FSTL1
ITGAV
JAG1
JAG2
KCNJ8
LPL
LRPAP1
LUM
MSX1
NRP1
OLR1
PDGFA
PF4
PGLYRP1
POSTN
PRG2
PTK2
S100A4
SERPINA5
SLCO2A1
SPP1
STC1
THBD
TIMP1
TNFRSF21
VAV2
VCAN
VEGFA
VTN

[truncated: 9 more sheets:  Inflammatory response, Apoptosis, IL-10, Collagen formation, Degradation of ECM, PI3K-AKT-MTOR, Cellular response to hypoxia, Radiosensitivity index, ROS]
